# Supplementary material for: Dual-Level Augmentation Radiomics Analysis for Multisequence MRI Meningioma Grading
Source: MDPI journal article supplement (doi:10.3390/cancers15225459), 2023-11-17
Supplement: s1 [file s1]

Table S1. The features extracted from the best model in 100 repetitions in 3-Fold CV

| 3-Fold CV                                                     |
|---------------------------------------------------------------|
| <b>Fold 1</b>                                                 |
| original_firstorder_Kurtosis_t1                               |
| logarithm_glszm_GrayLevelNonUniformity_t2                     |
| wavelet-HHH_ngtdm_Coarseness_t2                               |
| log-sigma-5-0-mm-3D_firstorder_Uniformity_t2                  |
| wavelet-LLL_glszm_GrayLevelNonUniformity_t2                   |
| wavelet-LLL_glszm_ZoneEntropy_t2                              |
| wavelet-HHH_ngtdm_Strength_t2                                 |
| log-sigma-5-0-mm-3D_glrlm_GrayLevelNonUniformityNormalized_t1 |
| <b>Fold 2</b>                                                 |
| original_firstorder_Kurtosis_t1                               |
| log-sigma-5-0-mm-3D_glcmm_ClusterProminence_t1                |
| log-sigma-5-0-mm-3D_glszm_ZonePercentage_t2                   |
| logarithm_glszm_GrayLevelNonUniformity_t2                     |
| squareroot_glszm_GrayLevelNonUniformity_t2                    |
| log-sigma-5-0-mm-3D_glrlm_GrayLevelNonUniformityNormalized_t1 |
| original_glszm_GrayLevelNonUniformity_t2                      |
| <b>Fold 3</b>                                                 |
| wavelet-LLL_firstorder_Kurtosis_t1                            |
| log-sigma-5-0-mm-3D_glrlm_GrayLevelNonUniformityNormalized_t1 |
| log-sigma-5-0-mm-3D_glcmm_MaximumProbability_t2               |
| wavelet-HLL_firstorder_TotalEnergy_t1                         |
| wavelet-LLL_gldm_LowGrayLevelEmphasis_t2                      |
| wavelet-HLL_firstorder_Energy_t1                              |
| wavelet-HLH_firstorder_Energy_t1                              |
| wavelet-HLH_firstorder_TotalEnergy_t1                         |
| log-sigma-5-0-mm-3D_glcmm_ClusterProminence_t1                |

Table S2. The features extracted from the best model in 100 repetitions in 5-Fold CV

| 5-Fold CV                                                     |
|---------------------------------------------------------------|
| <b>Fold 1</b>                                                 |
| log-sigma-5-0-mm-3D_glrlm_GrayLevelNonUniformityNormalized_t1 |
| original_firstorder_Kurtosis_t1                               |
| log-sigma-5-0-mm-3D_glcmm_MaximumProbability_t2               |
| log-sigma-1-0-mm-3D_firstorder_TotalEnergy_t1                 |
| log-sigma-1-0-mm-3D_firstorder_Energy_t1                      |
| <b>Fold 2</b>                                                 |
| original_firstorder_Kurtosis_t1                               |
| log-sigma-5-0-mm-3D_glcmm_ClusterProminence_t1                |
| log-sigma-5-0-mm-3D_glrlm_GrayLevelNonUniformityNormalized_t1 |
| squareroot_glszm_GrayLevelNonUniformity_t2                    |

---

log-sigma-5-0-mm-3D\_firstorder\_Uniformity\_t2  
original\_glszm\_GrayLevelNonUniformity\_t2  
logarithm\_glszm\_GrayLevelNonUniformity\_t2  
**Fold 3**  
original\_firstorder\_Kurtosis\_t1  
logarithm\_glszm\_GrayLevelNonUniformity\_t2  
log-sigma-5-0-mm-3D\_glcmm\_SumSquares\_t2  
log-sigma-5-0-mm-3D\_glrmm\_GrayLevelNonUniformityNormalized\_t1  
wavelet-LLL\_gldm\_LowGrayLevelEmphasis\_t2  
original\_glszm\_GrayLevelNonUniformity\_t2  
log-sigma-5-0-mm-3D\_glcmm\_ClusterProminence\_t1  
wavelet-LLL\_glszm\_SizeZoneNonUniformityNormalized\_t2  
squareroot\_glszm\_GrayLevelNonUniformity\_t2  
**Fold 4**  
original\_firstorder\_Kurtosis\_t1  
log-sigma-5-0-mm-3D\_glcmm\_ClusterProminence\_t1  
log-sigma-5-0-mm-3D\_glrmm\_GrayLevelNonUniformityNormalized\_t1  
log-sigma-5-0-mm-3D\_firstorder\_Uniformity\_t2  
**Fold 5**  
original\_firstorder\_Kurtosis\_t1  
log-sigma-5-0-mm-3D\_glcmm\_ClusterProminence\_t1  
logarithm\_firstorder\_InterquartileRange\_t1  
log-sigma-5-0-mm-3D\_glrmm\_GrayLevelNonUniformityNormalized\_t1

---

Table S3. The features extracted from the best model in 100 repetitions in 10-Fold CV

---

10-Fold CV

---

**Fold 1**  
original\_firstorder\_Kurtosis\_t1  
log-sigma-5-0-mm-3D\_glrmm\_GrayLevelNonUniformityNormalized\_t1  
log-sigma-5-0-mm-3D\_glcmm\_ClusterProminence\_t1  
squareroot\_glszm\_GrayLevelNonUniformity\_t2  
log-sigma-5-0-mm-3D\_firstorder\_Uniformity\_t2  
logarithm\_glszm\_GrayLevelNonUniformity\_t2  
original\_glszm\_GrayLevelNonUniformity\_t2  
**Fold 2**  
original\_firstorder\_Kurtosis\_t1  
log-sigma-5-0-mm-3D\_glrmm\_GrayLevelNonUniformityNormalized\_t1  
log-sigma-5-0-mm-3D\_glcmm\_ClusterProminence\_t1  
log-sigma-5-0-mm-3D\_glcmm\_MaximumProbability\_t2  
original\_glszm\_GrayLevelNonUniformity\_t2  
wavelet-LLL\_glszm\_ZoneEntropy\_t2  
squareroot\_glszm\_GrayLevelNonUniformity\_t2  
**Fold 3**  
original\_firstorder\_Kurtosis\_t1

---

---

log-sigma-5-0-mm-3D\_glrlm\_GrayLevelNonUniformityNormalized\_t1  
log-sigma-5-0-mm-3D\_firstorder\_Uniformity\_t2  
logarithm\_glszm\_GrayLevelNonUniformity\_t2  
wavelet-HLL\_firstorder\_Energy\_t1  
wavelet-HLL\_firstorder\_TotalEnergy\_t1  
original\_glszm\_GrayLevelNonUniformity\_t2  
log-sigma-5-0-mm-3D\_gldm\_ClusterProminence\_t1  
wavelet-LLL\_gldm\_LowGrayLevelEmphasis\_t2  
squareroot\_glszm\_GrayLevelNonUniformity\_t2

**Fold 4**

original\_firstorder\_Kurtosis\_t1  
log-sigma-5-0-mm-3D\_glrlm\_GrayLevelNonUniformityNormalized\_t1  
logarithm\_glszm\_GrayLevelNonUniformity\_t2  
log-sigma-5-0-mm-3D\_gldm\_ClusterProminence\_t1  
log-sigma-5-0-mm-3D\_firstorder\_Uniformity\_t2  
wavelet-LLL\_glszm\_ZoneEntropy\_t2  
original\_glszm\_GrayLevelNonUniformity\_t2  
squareroot\_glszm\_GrayLevelNonUniformity\_t2

**Fold 5**

original\_firstorder\_Kurtosis\_t1  
log-sigma-5-0-mm-3D\_glrlm\_GrayLevelNonUniformityNormalized\_t1  
original\_glszm\_GrayLevelNonUniformity\_t2  
log-sigma-5-0-mm-3D\_firstorder\_Uniformity\_t2  
log-sigma-5-0-mm-3D\_gldm\_GrayLevelVariance\_t2  
log-sigma-5-0-mm-3D\_gldm\_ClusterProminence\_t1  
log-sigma-5-0-mm-3D\_gldm\_MaximumProbability\_t2  
wavelet-LLL\_glszm\_SizeZoneNonUniformityNormalized\_t2  
squareroot\_glszm\_GrayLevelNonUniformity\_t2

**Fold 6**

original\_firstorder\_Kurtosis\_t1  
log-sigma-5-0-mm-3D\_glrlm\_GrayLevelNonUniformityNormalized\_t1  
squareroot\_glszm\_GrayLevelNonUniformity\_t2  
log-sigma-5-0-mm-3D\_gldm\_MaximumProbability\_t2  
logarithm\_glszm\_GrayLevelNonUniformity\_t2  
log-sigma-5-0-mm-3D\_gldm\_ClusterProminence\_t1  
log-sigma-5-0-mm-3D\_firstorder\_Uniformity\_t2  
original\_glszm\_GrayLevelNonUniformity\_t2

**Fold 7**

original\_firstorder\_Kurtosis\_t1  
log-sigma-5-0-mm-3D\_glrlm\_GrayLevelNonUniformityNormalized\_t1  
log-sigma-5-0-mm-3D\_gldm\_ClusterProminence\_t1  
log-sigma-5-0-mm-3D\_firstorder\_Uniformity\_t2  
logarithm\_glszm\_GrayLevelNonUniformity\_t2  
squareroot\_glszm\_GrayLevelNonUniformity\_t2

---

---

original\_glszm\_GrayLevelNonUniformity\_t2

**Fold 8**

original\_firstorder\_Kurtosis\_t1

log-sigma-5-0-mm-3D\_glrIm\_GrayLevelNonUniformityNormalized\_t1

log-sigma-5-0-mm-3D\_glcM\_ClusterProminence\_t1

log-sigma-5-0-mm-3D\_glcM\_MaximumProbability\_t2

logarithm\_glszm\_GrayLevelNonUniformity\_t2

original\_glszm\_GrayLevelNonUniformity\_t2

squareroot\_glszm\_GrayLevelNonUniformity\_t2

**Fold 9**

original\_firstorder\_Kurtosis\_t1

log-sigma-5-0-mm-3D\_glrIm\_GrayLevelNonUniformityNormalized\_t1

log-sigma-5-0-mm-3D\_glcM\_ClusterProminence\_t1

log-sigma-5-0-mm-3D\_glcM\_JointEnergy\_t2

wavelet-HLL\_firstorder\_Energy\_t1

wavelet-LLL\_gldm\_LowGrayLevelEmphasis\_t2

wavelet-HLL\_firstorder\_TotalEnergy\_t1

**Fold 10**

original\_firstorder\_Kurtosis\_t1

log-sigma-5-0-mm-3D\_glrIm\_GrayLevelNonUniformityNormalized\_t1

log-sigma-5-0-mm-3D\_glcM\_MaximumProbability\_t2

squareroot\_glszm\_GrayLevelNonUniformity\_t2

wavelet-LLL\_glszm\_ZoneEntropy\_t2

logarithm\_glszm\_GrayLevelNonUniformity\_t2

original\_glszm\_GrayLevelNonUniformity\_t2

---
